# Supplementary material
Source: HighWire-hosted journal article supplement (https://www.cmajopen.ca/highwire/filestream/81204/field_highwire_adjunct_files/2/reviewer-comments-2018-0159.pdf)
Supplement: reviewer-comments-2018-0159.pdf [file reviewer-comments-2018-0159.pdf]

| Article details: 2018-0159                 |                                                                                                                                                                                                                                                                                                                                                                                                                                                                                                                                                                                                                                                                                                                                                                                                                                                                                                                                                                                                                                                                                                                                                                                                                                                                                                                                                                                                                                                                                                                                                                                                                                                                                                                                                                                                                                                                                                                                                                                                                                                                                                                                                                                                                                                                                                                                                                                                                                                                                                                                                                                                                                                                                                                                                                                                                                                                                                                                                                                                                                                                                                                                                                                                                                                                                                                                                                                                                                                                                                                                                                                                                                                                                                                                                                                                                                                                                                                                                                                                                                                                                                                                                                                                                                                                                                                                                                                                                                                                                                                    |
|--------------------------------------------|--------------------------------------------------------------------------------------------------------------------------------------------------------------------------------------------------------------------------------------------------------------------------------------------------------------------------------------------------------------------------------------------------------------------------------------------------------------------------------------------------------------------------------------------------------------------------------------------------------------------------------------------------------------------------------------------------------------------------------------------------------------------------------------------------------------------------------------------------------------------------------------------------------------------------------------------------------------------------------------------------------------------------------------------------------------------------------------------------------------------------------------------------------------------------------------------------------------------------------------------------------------------------------------------------------------------------------------------------------------------------------------------------------------------------------------------------------------------------------------------------------------------------------------------------------------------------------------------------------------------------------------------------------------------------------------------------------------------------------------------------------------------------------------------------------------------------------------------------------------------------------------------------------------------------------------------------------------------------------------------------------------------------------------------------------------------------------------------------------------------------------------------------------------------------------------------------------------------------------------------------------------------------------------------------------------------------------------------------------------------------------------------------------------------------------------------------------------------------------------------------------------------------------------------------------------------------------------------------------------------------------------------------------------------------------------------------------------------------------------------------------------------------------------------------------------------------------------------------------------------------------------------------------------------------------------------------------------------------------------------------------------------------------------------------------------------------------------------------------------------------------------------------------------------------------------------------------------------------------------------------------------------------------------------------------------------------------------------------------------------------------------------------------------------------------------------------------------------------------------------------------------------------------------------------------------------------------------------------------------------------------------------------------------------------------------------------------------------------------------------------------------------------------------------------------------------------------------------------------------------------------------------------------------------------------------------------------------------------------------------------------------------------------------------------------------------------------------------------------------------------------------------------------------------------------------------------------------------------------------------------------------------------------------------------------------------------------------------------------------------------------------------------------------------------------------------------------------------------------------------------------------------|
| Title                                      | Cause-specific mortality among people living with HIV in Ontario Canada, 1995–2014: a population-based study                                                                                                                                                                                                                                                                                                                                                                                                                                                                                                                                                                                                                                                                                                                                                                                                                                                                                                                                                                                                                                                                                                                                                                                                                                                                                                                                                                                                                                                                                                                                                                                                                                                                                                                                                                                                                                                                                                                                                                                                                                                                                                                                                                                                                                                                                                                                                                                                                                                                                                                                                                                                                                                                                                                                                                                                                                                                                                                                                                                                                                                                                                                                                                                                                                                                                                                                                                                                                                                                                                                                                                                                                                                                                                                                                                                                                                                                                                                                                                                                                                                                                                                                                                                                                                                                                                                                                                                                       |
| Authors                                    | Ann N. Burchell PhD, Janet Raboud PhD, Jessy Donelle MSc, Mona R. Loutfy MD, Sean B. Rourke PhD, Tim Rogers PhD, Ron Rosenes LLD, Clare Liddy MD, Claire E. Kendall MD PhD                                                                                                                                                                                                                                                                                                                                                                                                                                                                                                                                                                                                                                                                                                                                                                                                                                                                                                                                                                                                                                                                                                                                                                                                                                                                                                                                                                                                                                                                                                                                                                                                                                                                                                                                                                                                                                                                                                                                                                                                                                                                                                                                                                                                                                                                                                                                                                                                                                                                                                                                                                                                                                                                                                                                                                                                                                                                                                                                                                                                                                                                                                                                                                                                                                                                                                                                                                                                                                                                                                                                                                                                                                                                                                                                                                                                                                                                                                                                                                                                                                                                                                                                                                                                                                                                                                                                         |
| Reviewer 1                                 | Kentaro Iwata                                                                                                                                                                                                                                                                                                                                                                                                                                                                                                                                                                                                                                                                                                                                                                                                                                                                                                                                                                                                                                                                                                                                                                                                                                                                                                                                                                                                                                                                                                                                                                                                                                                                                                                                                                                                                                                                                                                                                                                                                                                                                                                                                                                                                                                                                                                                                                                                                                                                                                                                                                                                                                                                                                                                                                                                                                                                                                                                                                                                                                                                                                                                                                                                                                                                                                                                                                                                                                                                                                                                                                                                                                                                                                                                                                                                                                                                                                                                                                                                                                                                                                                                                                                                                                                                                                                                                                                                                                                                                                      |
| Institution                                | Division of Infectious Diseases, Kobe University Hospital, Kobe, Japan                                                                                                                                                                                                                                                                                                                                                                                                                                                                                                                                                                                                                                                                                                                                                                                                                                                                                                                                                                                                                                                                                                                                                                                                                                                                                                                                                                                                                                                                                                                                                                                                                                                                                                                                                                                                                                                                                                                                                                                                                                                                                                                                                                                                                                                                                                                                                                                                                                                                                                                                                                                                                                                                                                                                                                                                                                                                                                                                                                                                                                                                                                                                                                                                                                                                                                                                                                                                                                                                                                                                                                                                                                                                                                                                                                                                                                                                                                                                                                                                                                                                                                                                                                                                                                                                                                                                                                                                                                             |
| General comments (author response in bold) | <p>Would like to suggest adding figures illustrating the results of the manuscript to visualize better the alteration on cause of death of PLWH in Ontario over time. {Editor note: this is optional but you could add this to an appendix.}</p> <p><b>We appreciate this reviewer's suggestion, and it is our request that Figures 1a and 1b incorporate this visualization of changes in causes of death over time. Could the editor kindly clarify if additional figures are requested? (Figures 1a and 1b)</b></p>                                                                                                                                                                                                                                                                                                                                                                                                                                                                                                                                                                                                                                                                                                                                                                                                                                                                                                                                                                                                                                                                                                                                                                                                                                                                                                                                                                                                                                                                                                                                                                                                                                                                                                                                                                                                                                                                                                                                                                                                                                                                                                                                                                                                                                                                                                                                                                                                                                                                                                                                                                                                                                                                                                                                                                                                                                                                                                                                                                                                                                                                                                                                                                                                                                                                                                                                                                                                                                                                                                                                                                                                                                                                                                                                                                                                                                                                                                                                                                                             |
| Reviewer 2                                 | Alexander Singer                                                                                                                                                                                                                                                                                                                                                                                                                                                                                                                                                                                                                                                                                                                                                                                                                                                                                                                                                                                                                                                                                                                                                                                                                                                                                                                                                                                                                                                                                                                                                                                                                                                                                                                                                                                                                                                                                                                                                                                                                                                                                                                                                                                                                                                                                                                                                                                                                                                                                                                                                                                                                                                                                                                                                                                                                                                                                                                                                                                                                                                                                                                                                                                                                                                                                                                                                                                                                                                                                                                                                                                                                                                                                                                                                                                                                                                                                                                                                                                                                                                                                                                                                                                                                                                                                                                                                                                                                                                                                                   |
| Institution                                | Department of Family Medicine, University of Manitoba, Winnipeg, Man.                                                                                                                                                                                                                                                                                                                                                                                                                                                                                                                                                                                                                                                                                                                                                                                                                                                                                                                                                                                                                                                                                                                                                                                                                                                                                                                                                                                                                                                                                                                                                                                                                                                                                                                                                                                                                                                                                                                                                                                                                                                                                                                                                                                                                                                                                                                                                                                                                                                                                                                                                                                                                                                                                                                                                                                                                                                                                                                                                                                                                                                                                                                                                                                                                                                                                                                                                                                                                                                                                                                                                                                                                                                                                                                                                                                                                                                                                                                                                                                                                                                                                                                                                                                                                                                                                                                                                                                                                                              |
| General comments (author response in bold) | <p>The introduction clearly represents the current state of knowledge and the purpose. It does this in 3 paragraphs which I believe is fine, but does go against the journal standard (which perhaps should be waived given as written it is grammatically correct). <b>Thank you for this comment. We have reformatted the introduction to be 2 paragraphs (Page #3).</b></p> <p>The description of methods is clear but may benefit from section headings to improve organization. <b>We have incorporated subheadings as requested in both the methods and results sections (Pages #3-6).</b></p>                                                                                                                                                                                                                                                                                                                                                                                                                                                                                                                                                                                                                                                                                                                                                                                                                                                                                                                                                                                                                                                                                                                                                                                                                                                                                                                                                                                                                                                                                                                                                                                                                                                                                                                                                                                                                                                                                                                                                                                                                                                                                                                                                                                                                                                                                                                                                                                                                                                                                                                                                                                                                                                                                                                                                                                                                                                                                                                                                                                                                                                                                                                                                                                                                                                                                                                                                                                                                                                                                                                                                                                                                                                                                                                                                                                                                                                                                                               |
| Reviewer 3                                 | Max Trubnikov                                                                                                                                                                                                                                                                                                                                                                                                                                                                                                                                                                                                                                                                                                                                                                                                                                                                                                                                                                                                                                                                                                                                                                                                                                                                                                                                                                                                                                                                                                                                                                                                                                                                                                                                                                                                                                                                                                                                                                                                                                                                                                                                                                                                                                                                                                                                                                                                                                                                                                                                                                                                                                                                                                                                                                                                                                                                                                                                                                                                                                                                                                                                                                                                                                                                                                                                                                                                                                                                                                                                                                                                                                                                                                                                                                                                                                                                                                                                                                                                                                                                                                                                                                                                                                                                                                                                                                                                                                                                                                      |
| Institution                                | Indigenous Services Canada, Population Health and Primary Care Directorate, Ottawa, Ont.                                                                                                                                                                                                                                                                                                                                                                                                                                                                                                                                                                                                                                                                                                                                                                                                                                                                                                                                                                                                                                                                                                                                                                                                                                                                                                                                                                                                                                                                                                                                                                                                                                                                                                                                                                                                                                                                                                                                                                                                                                                                                                                                                                                                                                                                                                                                                                                                                                                                                                                                                                                                                                                                                                                                                                                                                                                                                                                                                                                                                                                                                                                                                                                                                                                                                                                                                                                                                                                                                                                                                                                                                                                                                                                                                                                                                                                                                                                                                                                                                                                                                                                                                                                                                                                                                                                                                                                                                           |
| General comments (author response in bold) | <p>1. P6, lines 31-32. Adding references to chronic hepatitis B and C co-infection as a factor affecting mortality may be considered. <b>The reviewer makes a good suggestion. As reference 6 specifically considers the impact of hepatitis B and C under their definition of liver disease, we have added "(in particular due to hepatitis B and C)" to this sentence (Page #3).</b></p> <p>2. Interpretation section may benefit from a suggestion that exact pathways of how ecological level measures affect HIV and other cause-specific mortality need to be established. <b>Thank you for this suggestion however, we do not fully understand the intent of this comment. Was it meant to refer to neighborhood level characteristics measured in this study, namely rurality and income quintile?</b></p> <p>3. The last sentence on p8, line 5 may benefit from adding a reference to Project ECHO (Extension of Community Healthcare Outcomes, <a href="https://echo.unm.edu/">https://echo.unm.edu/</a>) at the University of New Mexico School of Medicine. <b>This is an excellent suggestion. We have included a new reference for this program (reference 50).</b></p> <p>4. Table 1, neighbourhood income quintile may benefit from adding description that 1 quintile means "lowest" and 5th means "highest". <b>Thanks for this suggestion, which we have incorporated (Table 1).</b></p> <p>Manuscript Requirements:</p> <p>1. Please include study type in your title. <b>We have updated the title per the editor's request (Page #1).</b></p> <p>2. Abstract: CMAJ Open requires a structured abstract of no more than 250 words that contains the following sections:</p> <ul style="list-style-type: none"> <li>o Background: Includes a clear statement of the study aim and research question. (2 sentences)</li> <li>o Methods: Includes the research design, setting of the study, and participants, including number participating and criteria for selection, entry and exclusion. The interventions, if applicable, should be clearly outlined, as well as primary and secondary outcome measures.</li> <li>o Results: The main findings should be quantified with 95% confidence intervals and the number needed to treat or harm, if applicable. Absolute, rather than relative, risks are preferable.</li> <li>o Interpretation: This should include the main conclusions and implications. (2 sentences)</li> </ul> <p><b>We have revised our 250 word abstract accordingly (Page #2).</b></p> <p>3. Introduction: Please ensure this is no longer than 2 paragraphs. A statement of the study aim and research question should be included at the end of the introduction. <b>We have reformatted the introduction to be 2 paragraphs (Page #3).</b></p> <p>4. Methods: Subheadings (e.g., setting, design, sources of data, statistical analysis) are helpful for readers; these will vary depending on the study type. <b>We have included subheadings for both methods and results (Pages #3-6).</b></p> <p>5. Interpretation: Please include the following 4 main categories: main findings (1 paragraph); explanation and comparison with other studies (2 paragraphs); limitations (1 paragraph); and conclusions and implications for practice and future research (1 paragraph). <b>We have revised the interpretation section accordingly. However, please note that our explanation and comparison sections remain at 3 paragraphs for readability. We are open to suggestions to re-format the content of this section if the editor wishes (Pages #6-8).</b></p> <p>6. Please ensure your final word count is below 2500 words. <b>Incorporating requested changes, our final word count is 2413 words (All pages).</b></p> <p>7. Abbreviations: For only the most standard abbreviations (i.e., 95% CI, SD, OR, RR, HR), please spell out at first mention and include the abbreviation in parentheses. The abbreviations may be used throughout the remainder of the manuscript. Please remove all other abbreviations. <b>We have removed all non-standard abbreviations, in particular PLWH, throughout the paper (All pages).</b></p> <p>8. Please include up to 1 academic and 1 professional degree after each author's name. <b>We have ensured the number of degrees meets journal criteria (Page 1).</b></p> <p>9. Please include a reporting guideline checklist (if applicable for your study type) from the appropriate reporting guideline. For</p> |

more information, see the Equator Network ([www.equator-network.org/](http://www.equator-network.org/))

**A STROBE checklist was attached with our original submission (Attachment).**
